# Supplementary material for: Syntheses and structures of metal tetrazole coordination polymers
Source: Royal Society of Chemistry journal article supplement (doi:10.1039/b518052j), 2006-01-01
Supplement: b518052j.pdf [file b518052j.pdf]

Selected bond lengths Å and angles (°) for complex **3-9**.

**Complex 3**

|             |          |             |          |
|-------------|----------|-------------|----------|
| Cu(1)-N(2a) | 2.128(8) | Cu(1)-N(6b) | 2.141(8) |
| Cu(1)-N(2b) | 2.128(8) | Cu(2)-N(4)  | 1.933(7) |
| Cu(1)-N(2)  | 2.128(8) | Cu(2)-N(5c) | 2.003(8) |
| Cu(1)-N(6a) | 2.141(8) | Cu(2)-N(1c) | 2.032(7) |
| Cu(1)-N(6)  | 2.141(8) | Cu(2)-N(3d) | 2.097(8) |

|                   |          |                   |          |
|-------------------|----------|-------------------|----------|
| N(2a)-Cu(1)-N(2b) | 91.1(3)  | N(2b)-Cu(1)-N(6b) | 89.8(3)  |
| N(2a)-Cu(1)-N(2)  | 91.1(3)  | N(2)-Cu(1)-N(6b)  | 90.0(3)  |
| N(2b)-Cu(1)-N(2)  | 91.1(3)  | N(6a)-Cu(1)-N(6b) | 89.0(3)  |
| N(2)-Cu(1)-N(6a)  | 89.8(3)  | N(6)-Cu(1)-N(6b)  | 89.0(3)  |
| N(2b)-Cu(1)-N(6a) | 90.1(3)  | N(4)-Cu(2)-N(5c)  | 123.4(3) |
| N(2)-Cu(1)-N(6a)  | 178.5(3) | N(4)-Cu(2)-N(1c)  | 126.3(3) |
| N(2a)-Cu(1)-N(6)  | 89.8(3)  | N(5c)-Cu(2)-N(1c) | 98.6(3)  |
| N(2b)-Cu(1)-N(6)  | 178.5(3) | N(4)-Cu(2)-N(3d)  | 111.1(3) |
| N(2)-Cu(1)-N(6)   | 89.8(3)  | N(5c)-Cu(2)-N(3d) | 94.1(3)  |
| N(6a)-Cu(1)-N(6)  | 89.0(3)  | N(1c)-Cu(2)-N(3d) | 95.8(3)  |
| N(2a)-Cu(1)-N(6b) | 178.5(3) |                   |          |

Symmetry codes: a)  $-x+y, -x+1, z$ ; b)  $-y+1, x-y+1, z$ ; c)  $y, -x+y, -z+1$ ; d)  $-x+1, -y+1, -z+1$

**Complex 4**

|             |          |              |           |
|-------------|----------|--------------|-----------|
| Cu(1)-N(2)  | 1.958(3) | Cu(2)-N(1c)  | 2.001(3)  |
| Cu(1)-N(2a) | 1.958(3) | Cu(2)-N(5d)  | 2.148(3)  |
| Cu(1)-N(3)  | 2.339(5) | Cu(2)-N(5e)  | 2.148(3)  |
| Cu(1)-N(5b) | 2.363(4) | Cu(2)-Cu(2f) | 2.589 (2) |
| Cu(2)-N(1)  | 2.001(3) |              |           |

|                   |            |                   |            |
|-------------------|------------|-------------------|------------|
| N(2)-Cu(1)-N(2a)  | 149.80(17) | N(1)-Cu(2)-N(1c)  | 117.59(15) |
| N(2)-Cu(1)-N(3)   | 98.73(9)   | N(1)-Cu(2)-N(5d)  | 106.94(14) |
| N(2a)-Cu(1)-N(3)  | 98.73(9)   | N(1c)-Cu(2)-N(5d) | 109.47(13) |
| N(2)-Cu(1)-N(5b)  | 102.29(9)  | N(1)-Cu(2)-N(5e)  | 109.47(13) |
| N(2a)-Cu(1)-N(5b) | 102.29(9)  | N(1c)-Cu(2)-N(5e) | 106.94(14) |
| N(3)-Cu(1)-N(5b)  | 89.57(15)  | N(5d)-Cu(2)-N(5e) | 105.86(14) |

Symmetry codes: a)  $x, y, -z$ ; b)  $-x+1/2, y+1/2, -z$ ; c)  $-x+1, -y-1, z$ ; d)  $x+1/2, -y-1/2, z$ ; e)  $-x+1/2, y-1/2, -z$ ;

f)  $-x+1,-y-1,-z$ ; g)  $x-1/2,-y-1/2,z$ .

### Complex 5

|                   |            |                    |            |
|-------------------|------------|--------------------|------------|
| Ag(1)-N(2a)       | 2.226(4)   | Ag(2)-N(1)         | 2.263(3)   |
| Ag(1)-N(2)        | 2.226(4)   | Ag(2)-N(5d)        | 2.394(3)   |
| Ag(1)-N(5b)       | 2.489(5)   | Ag(2)-N(5e)        | 2.394(3)   |
| Ag(1)-N(3)        | 2.509(5)   | N(5)-Ag(2g)        | 2.394(3)   |
| Ag(2)-Ag(2f)      | 2.986(4)   | N(5)-Ag(2b)        | 2.394(3)   |
|                   |            |                    |            |
| N(2a)-Ag(1)-N(2)  | 150.61(13) | N(1)-Ag(2)-N(5d)   | 114.77(12) |
| N(2a)-Ag(1)-N(5b) | 100.75(7)  | N(1c)-Ag(2)-N(5e)  | 114.77(12) |
| N(2)-Ag(1)-N(5b)  | 100.75(7)  | N(1)-Ag(2)-N(5e)   | 100.91(12) |
| N(2a)-Ag(1)-N(3)  | 100.97(7)  | N(5d)-Ag(2)-N(5e)  | 102.85(14) |
| N(2)-Ag(1)-N(3)   | 100.97(7)  | Ag(2g)-N(5)-Ag(2b) | 77.15(14)  |
| N(5b)-Ag(1)-N(3)  | 84.07(12)  | Ag(2g)-N(5)-Ag(1e) | 113.02(11) |
| N(1c)-Ag(2)-N(1)  | 121.61(14) | Ag(2b)-N(5)-Ag(1e) | 113.02(11) |
| N(1c)-Ag(2)-N(5d) | 100.91(12) |                    |            |

Symmetry codes: a)  $x,y,-z$ ; b)  $-x+1/2,y+1/2,-z$ ; c)  $-x+1,-y-1,z$ ; d)  $x+1/2,-y-1/2,z$ ; e)  $-x+1/2,y-1/2,-z$ ;

f)  $-x+1,-y-1,-z$ ; g)  $x-1/2,-y-1/2,z$ .

### Complex 6

|                     |           |                     |           |
|---------------------|-----------|---------------------|-----------|
| Cu(1)-N(15a)        | 2.017(12) | Cu(4)-N(11g)        | 1.992(12) |
| Cu(1)-N(15b)        | 2.017(12) | Cu(4)-N(2)          | 2.032(12) |
| Cu(1)-N(4)          | 2.066(13) | Cu(4)-N(13d)        | 2.056(11) |
| Cu(1)-N(4c)         | 2.066(13) | Cu(4)-N(8)          | 2.063(11) |
| Cu(2)-N(3a)         | 2.019(13) | Cu(5)-N(10)         | 2.015(12) |
| Cu(2)-N(3)          | 2.019(13) | Cu(5)-N(10h)        | 2.015(12) |
| Cu(2)-N(16a)        | 2.078(12) | Cu(5)-N(5h)         | 2.038(11) |
| Cu(2)-N(16)         | 2.078(12) | Cu(5)-N(5)          | 2.038(11) |
| Cu(3)-N(14d)        | 1.979(12) | Cu(6)-N(6i)         | 1.997(13) |
| Cu(3)-N(7e)         | 2.029(12) | Cu(6)-N(6)          | 1.997(13) |
| Cu(3)-N(12f)        | 2.066(13) | Cu(6)-N(9)          | 2.120(12) |
| Cu(3)-N(1)          | 2.071(12) | Cu(6)-N(9i)         | 2.120(12) |
|                     |           |                     |           |
| N(15a)-Cu(1)-N(15b) | 113.9(7)  | N(11f)-Cu(4)-N(2)   | 123.3(5)  |
| N(15a)-Cu(1)-N(4)   | 107.5(5)  | N(11f)-Cu(4)-N(13d) | 115.0(5)  |
| N(15b)-Cu(1)-N(4)   | 113.5(5)  | N(2)-Cu(4)-N(13d)   | 107.1(5)  |

|                     |          |                    |          |
|---------------------|----------|--------------------|----------|
| N(15a)-Cu(1)-N(4c)  | 113.5(5) | N(11f)-Cu(4)-N(8)  | 106.7(5) |
| N(15b)-Cu(1)-N(4c)  | 107.5(5) | N(2)-Cu(4)-N(8)    | 100.9(5) |
| N(4)-Cu(1)-N(4c)    | 100.3(7) | N(13d)-Cu(4)-N(8)  | 100.5(6) |
| N(3a)-Cu(2)-N(3)    | 134.8(8) | N(10)-Cu(5)-N(10h) | 116.6(7) |
| N(3a)-Cu(2)-N(16a)  | 99.7(5)  | N(10)-Cu(5)-N(5h)  | 107.2(5) |
| N(3)-Cu(2)-N(16a)   | 107.1(5) | N(10h)-Cu(5)-N(5h) | 108.9(5) |
| N(3a)-Cu(2)-N(16)   | 107.1(5) | N(10)-Cu(5)-N(5)   | 108.9(5) |
| N(3)-Cu(2)-N(16)    | 99.7(5)  | N(10h)-Cu(5)-N(5)  | 107.2(5) |
| N(16a)-Cu(2)-N(16)  | 106.0(8) | N(5h)-Cu(5)-N(5)   | 107.6(7) |
| N(14d)-Cu(3)-N(7e)  | 127.1(5) | N(6i)-Cu(6)-N(6)   | 132.6(7) |
| N(14d)-Cu(3)-N(12f) | 110.3(5) | N(6i)-Cu(6)-N(9)   | 104.3(5) |
| N(7e)-Cu(3)-N(12f)  | 106.8(5) | N(6)-Cu(6)-N(9)    | 106.3(5) |
| N(14d)-Cu(3)-N(1)   | 105.4(5) | N(6i)-Cu(6)-N(9i)  | 106.3(5) |
| N(7e)-Cu(3)-N(1)    | 97.7(5)  | N(6)-Cu(6)-N(9i)   | 104.3(5) |
| N(12f)-Cu(3)-N(1)   | 107.6(6) | N(9)-Cu(6)-N(9i)   | 98.0(7)  |

Symmetry codes: a)x,-y+2,-z+1; b)-x+1,-y+2,z-1/2; c)-x+1,y,-z+1/2; d)  
x-1/2,-y+3/2,-z+1; e)-x+1/2,-y+3/2,z-1/2; f)-x+1,-y+1,z-1/2; g)x-1/2,y+1/2,z;  
h)x,-y+1,-z+1; i)-x+1,y,-z+3/2.

#### Complex 7

|                   |           |                  |           |
|-------------------|-----------|------------------|-----------|
| Ag(1)-N(4a)       | 2.178(12) | Ag(1)-N(1)       | 2.248(11) |
| Ag(1)-N(2b)       | 2.231(13) |                  |           |
| N(4a)-Ag(1)-N(2b) | 127.3(4)  | N(4a)-Ag(1)-N(1) | 125.5(4)  |
| N(2b)-Ag(1)-N(1)  | 107.2(4)  |                  |           |

Symmetry codes: a) x+1/2,-y+1/2,z+1/2; b) -x,-y,-z

#### Complex 8

|                   |            |                    |            |
|-------------------|------------|--------------------|------------|
| Ag(1)-N(4a)       | 2.266(4)   | Ag(2)-N(7)         | 2.314(5)   |
| Ag(1)-N(5)        | 2.285(4)   | Ag(2)-N(12d)       | 2.319(5)   |
| Ag(1)-N(9b)       | 2.380(4)   | Ag(3)-N(8)         | 2.105(4)   |
| Ag(1)-N(2)        | 2.383(5)   | Ag(3)-N(11)        | 2.129(4)   |
| Ag(2)-N(1c)       | 2.301(4)   | Ag(3)-Ag(3e)       | 3.3222(11) |
| Ag(2)-N(3)        | 2.314(5)   |                    |            |
| N(4a)-Ag(1)-N(5)  | 134.31(17) | N(1c)-Ag(2)-N(7)   | 119.41(17) |
| N(4a)-Ag(1)-N(2)  | 107.36(15) | N(3)-Ag(2)-N(12d)  | 116.47(18) |
| N(5)-Ag(1)-N(2)   | 105.70(17) | N(1c)-Ag(2)-N(12d) | 104.09(19) |
| N(4a)-Ag(1)-N(9b) | 105.36(18) | N(7)-Ag(2)-N(12d)  | 105.33(18) |
| N(5)-Ag(1)-N(9b)  | 98.07(18)  | N(8)-Ag(3)-N(11)   | 164.3(2)   |

|                  |            |                    |            |
|------------------|------------|--------------------|------------|
| N(2)-Ag(1)-N(9b) | 101.24(17) | N(8)-Ag(3)-Ag(3e)  | 106.24(16) |
| N(3)-Ag(2)-N(1c) | 106.07(15) | N(11)-Ag(3)-Ag(3e) | 71.24(13)  |
| N(3)-Ag(2)-N(7)  | 106.09(16) |                    |            |

Symmetry codes: a)  $x+1/2,-y+1/2,-z$ ; b)  $-x+1,-y+1,z+1/2$ ; c)  $x-1/2,-y+1/2,-z$ ; d)  $x,-y+1,-z$ ; e)  $-x+1,y,-z-1/2$ .

### Complex 9

|                   |            |                   |            |
|-------------------|------------|-------------------|------------|
| Ag(1)-N(3a)       | 2.238(3)   | Ag(1)-N(5)        | 2.354(3)   |
| Ag(1)-N(2b)       | 2.312(3)   | Ag(1)-N(4c)       | 2.469(3)   |
| N(3a)-Ag(1)-N(2b) | 110.44(11) | N(3a)-Ag(1)-N(4c) | 105.30(10) |
| N(3a)-Ag(1)-N(5)  | 133.49(11) | N(2b)-Ag(1)-N(4c) | 121.36(11) |
| N(2b)-Ag(1)-N(5)  | 101.38(10) | N(5)-Ag(1)-N(4c)  | 84.65(10)  |

Symmetry codes: a)  $x,y-1,z$

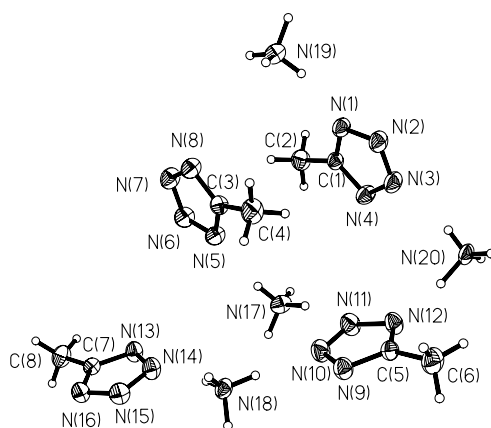

Fig. S1 View of the structure of **1** with 35% thermal ellipsoid.

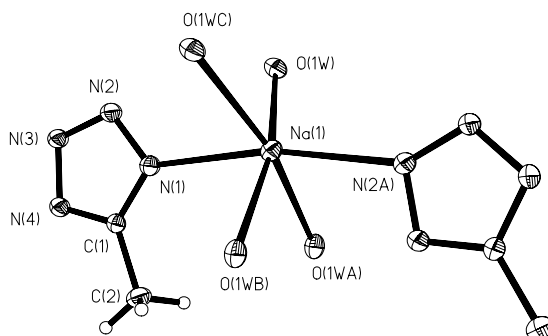

**Fig. S2** View of the coordination environment of sodium ion in **2**.

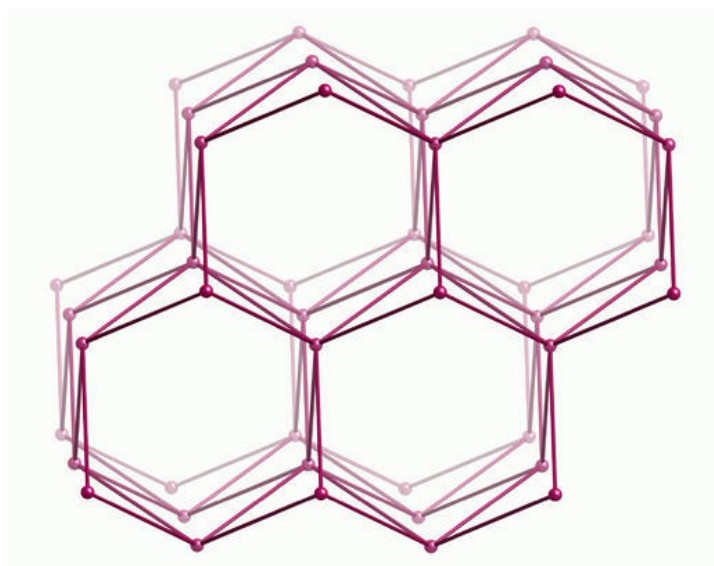

**Fig. S3** Network topology in **3**, with the nodes representing clusters viewed down the *c* axis.

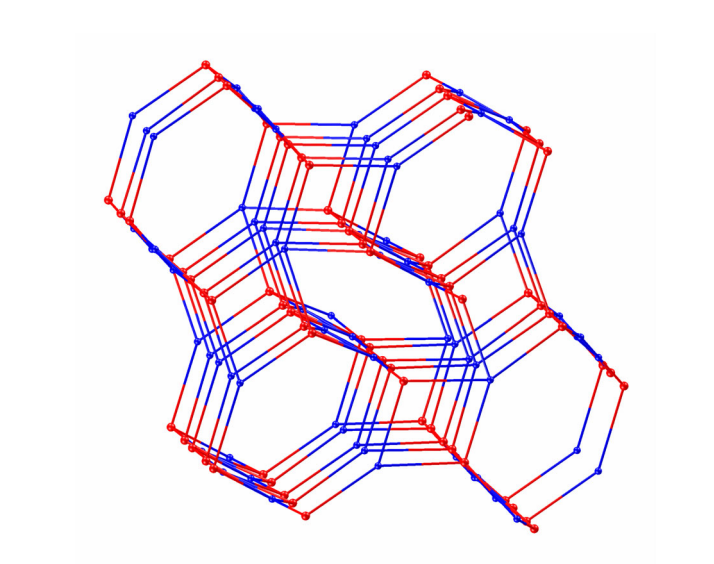

**Fig. S4** Network topology in **6**.
